# Supplementary material for: Arbitrary-ordered pulsed programming achieving 11 well-separated programming levels via a multilevel transistor–memristor series configuration
Source: Royal Society of Chemistry journal article supplement (doi:10.1039/d5tc03399c), 2025-11-25
Supplement: d5tc03399c1.pdf [file d5tc03399c1.pdf]

## Supporting Information

### *Arbitrary-Ordered Pulsed Programming Achieving 11 Well-Separated Programming Levels via a Multilevel Transistor–Memristor Series Configuration*

*Jing-Ci Gao<sup>1</sup>, Kuan-Han Lin<sup>2</sup>, Wei-Lun Chen<sup>2</sup>, Kai-Shin Hsu<sup>2</sup>, Chi-Chein Chen<sup>2</sup>, Jen- Sue  
Chen<sup>\*1,2</sup>*

<sup>1</sup>Program on Semiconductor Packaging and Testing, Academy of Innovative Semiconductor  
and Sustainable Manufacturing, National Cheng Kung University Tainan 70101, Taiwan

<sup>2</sup>Department of Materials Science and Engineering, National Cheng Kung University Tainan  
70101, Taiwan

*\* Corresponding author. E-mail: [jenschen@ncku.edu.tw](mailto:jenschen@ncku.edu.tw)*

**KEYWORDS:** Memristor, Multilevel resistive switching, Retention, endurance, Transistor–  
memristor configuration

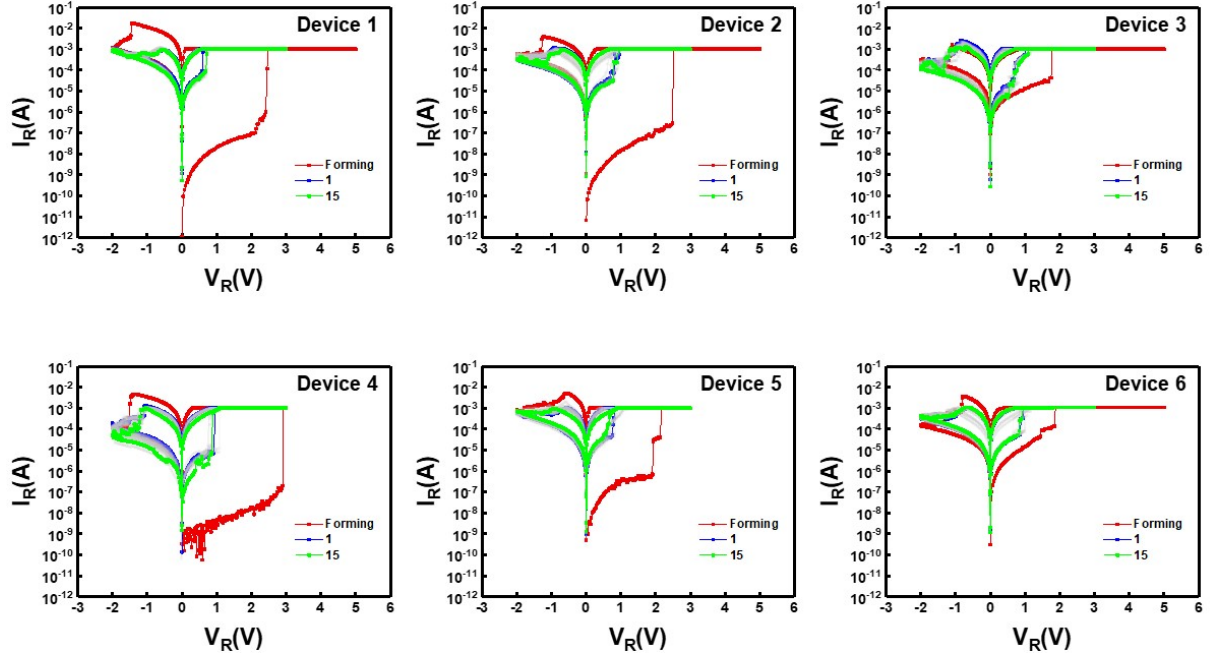

**Figure S1.** Device-to-device (D2D) I–V characteristics of Pt/Ta/ZrO<sub>x</sub>/Pt memristors (Device 1 to Device 6). Each cell underwent a forming process followed by 15 consecutive switching cycles. The consistent bipolar switching behavior and stable current levels confirm good D2D uniformity and operational reliability.

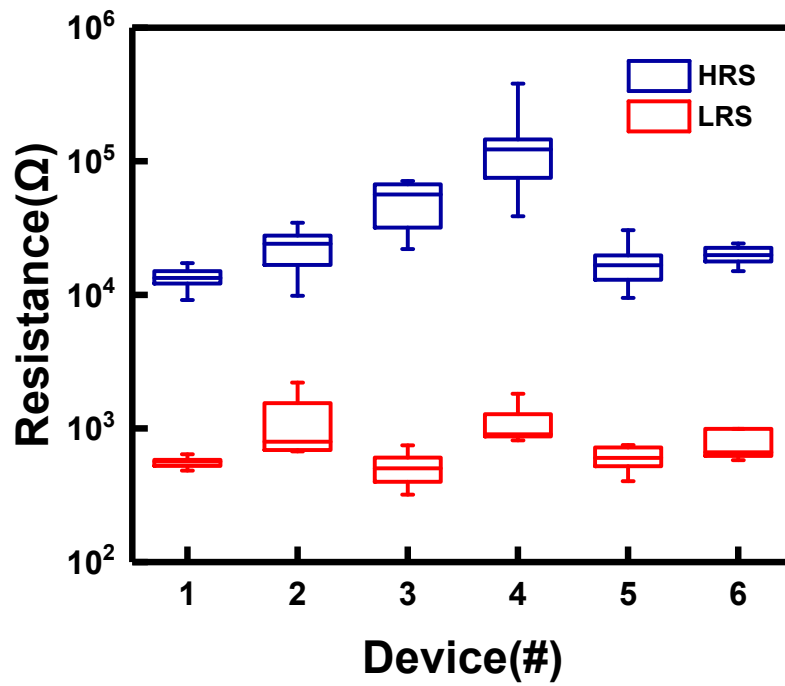

**Figure S2.** Box plots of HRS and LRS distributions across six devices, each measured over 15 switching cycles. The results reflect reasonable device-to-device variation and switching stability, supporting the reproducibility shown in Supplementary Figure S1.

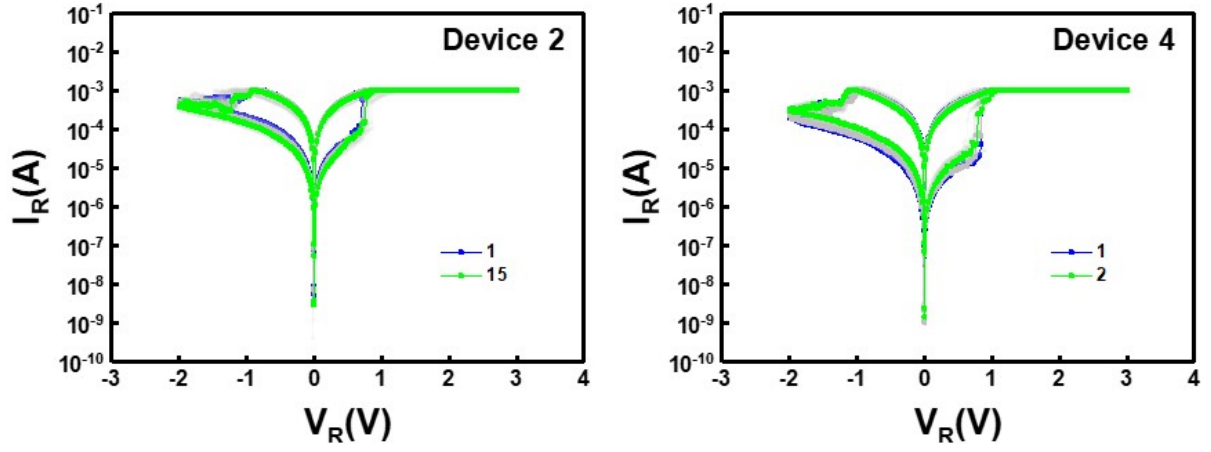

**Figure S3.** I–V characteristics of Device 2 and Device 4 remeasured after 50 days, showing stable resistive switching over 15 cycles. The preserved switching functionality confirms excellent environmental stability and long-term operational reliability of the devices.

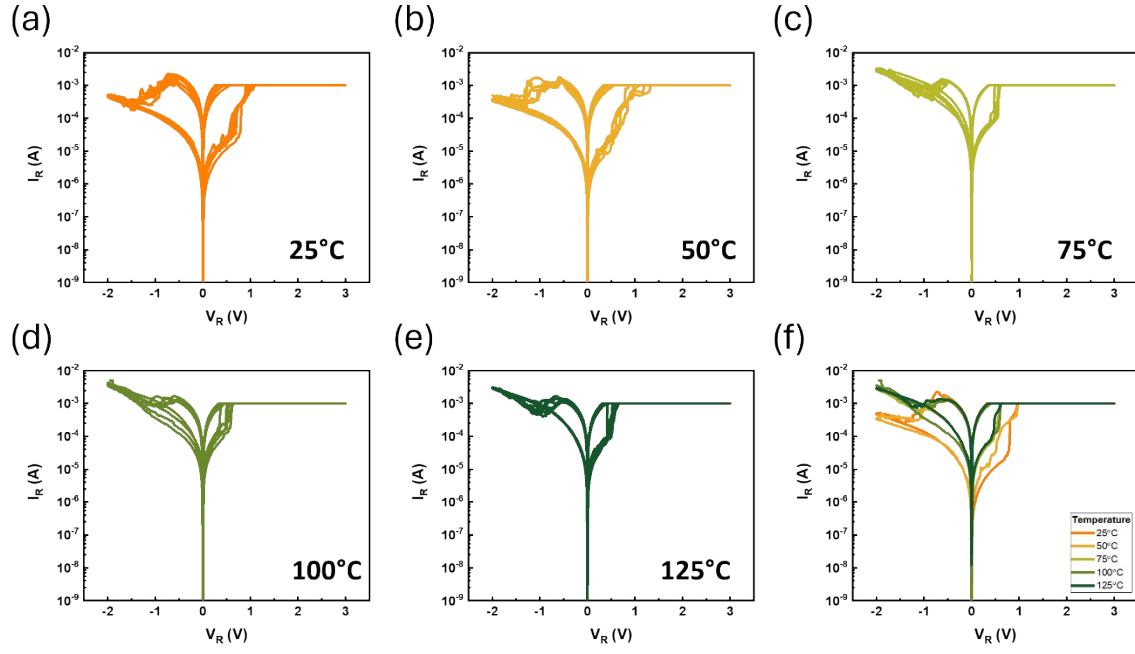

**Figure S4.** (a-e) Temperature-dependent I–V characteristics of the memristor measured at 25 °C, 50 °C, 75 °C, 100 °C and 125 °C under a fixed compliance current of 1 mA. (f) Overlap of representative I–V characteristics measured at 25 °C, 50 °C, 75 °C, 100 °C, and 125 °C.

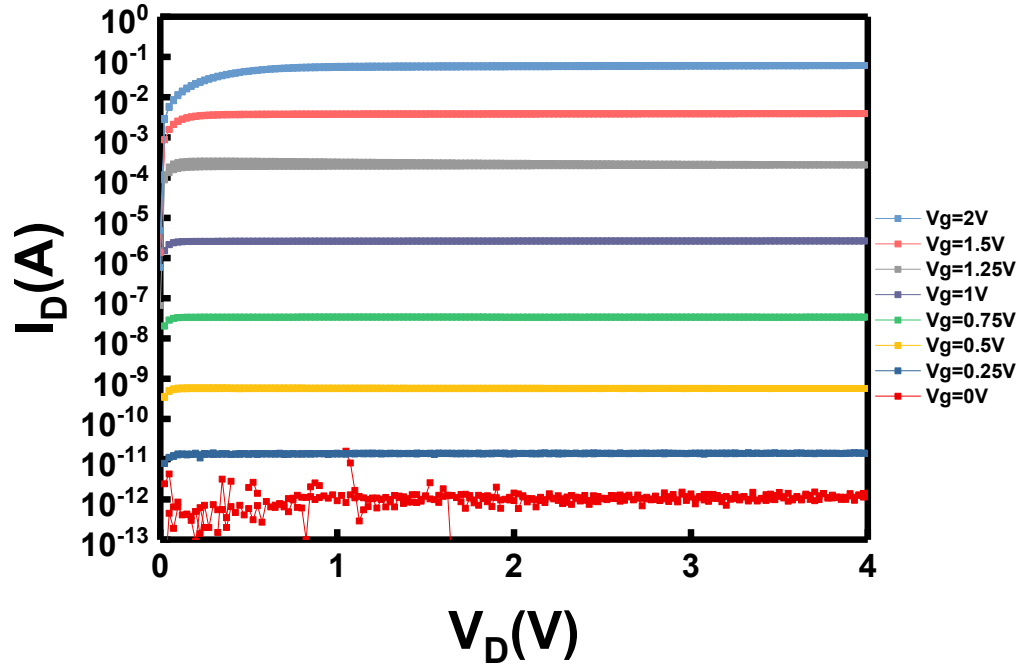

**Figure S5.** Transfer characteristics of the commercial NMOS transistor (2N7000). (a) Output curves under different  $V_g$  levels demonstrate well-controlled saturation current. This  $V_g$ -tunable current-limiting behavior enables the transistor to serve as an effective current compliance (CC) component during the SET process.

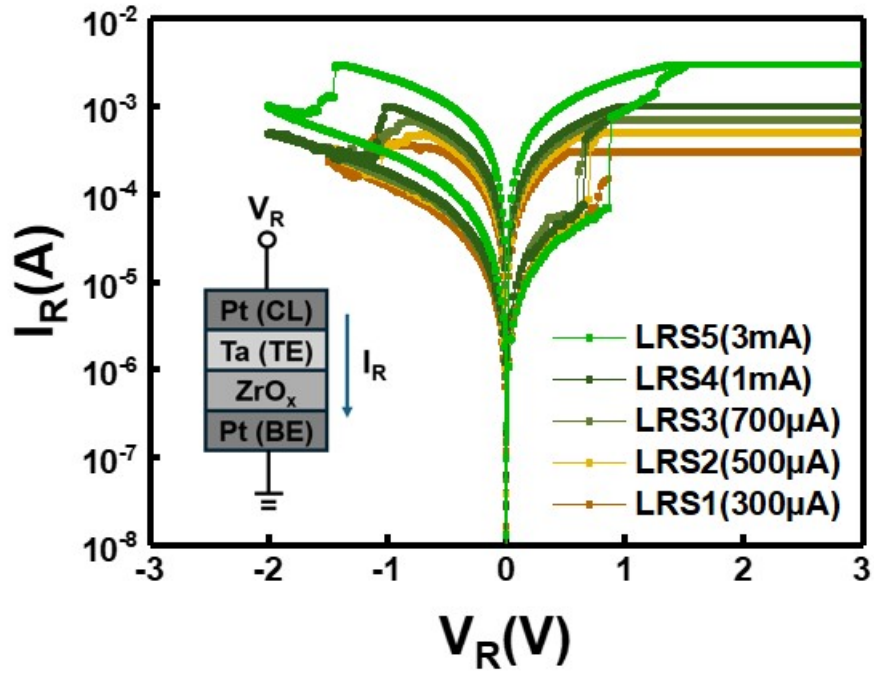

**Figure S6.** DC sweep curves of multilevel resistance states measured from a single memristor device under direct compliance current control. The linearity is highly consistent with that observed in the transistor–memristor series configuration, confirming that the current-limiting function does not distort intrinsic device behavior.

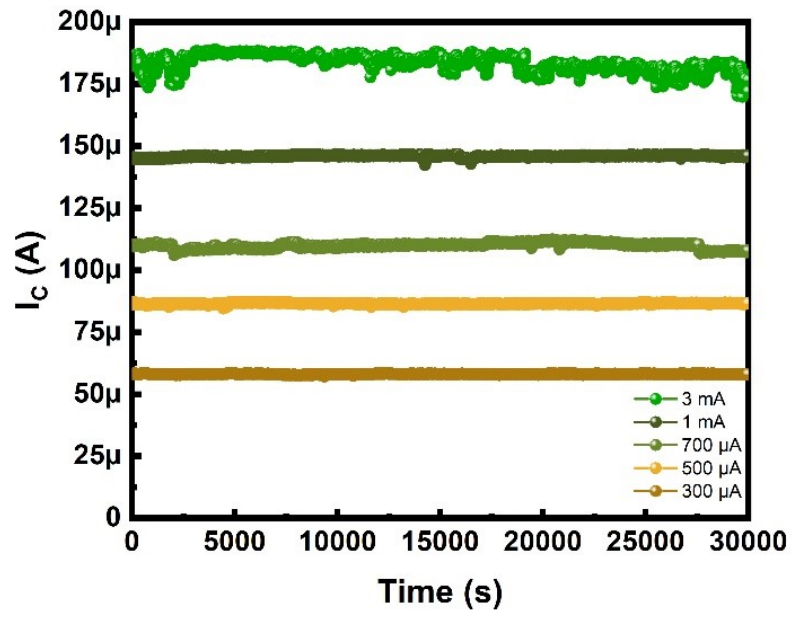

**Figure S7.** Retention performance of LRS1–LRS5 states measured on a single memristor at a read voltage of 0.1 V under 85 °C for 30,000 s, showing stable current without noticeable degradation, confirming excellent thermal stability and data retention capability.



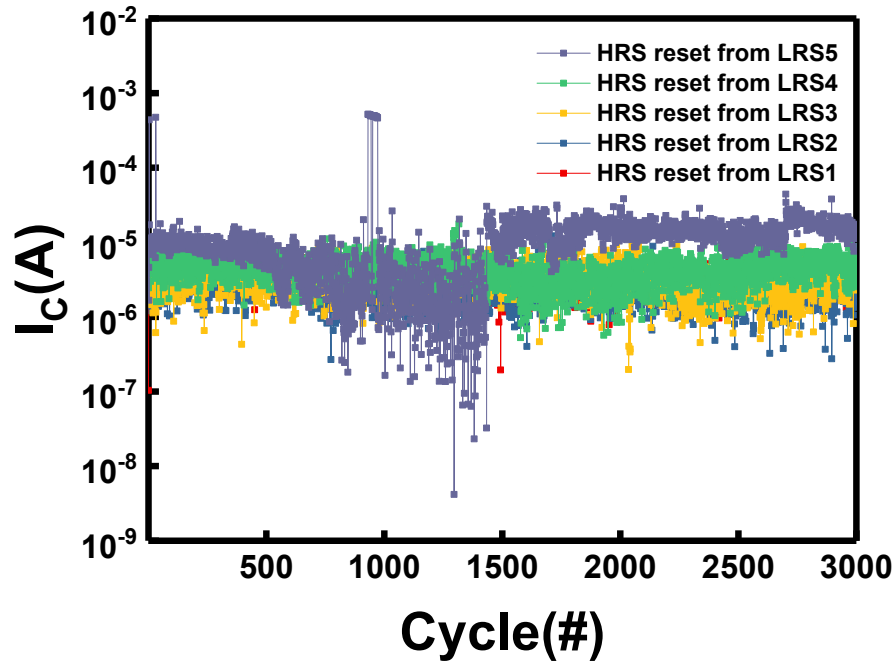

**Figure S8.** Endurance characteristics of HRS obtained from different initial LRS states (LRS1 to LRS5). The results demonstrate that the reset process consistently leads to a stable HRS, regardless of the preceding LRS, confirming the device's immunity to prior state history and its reliable switching repeatability.

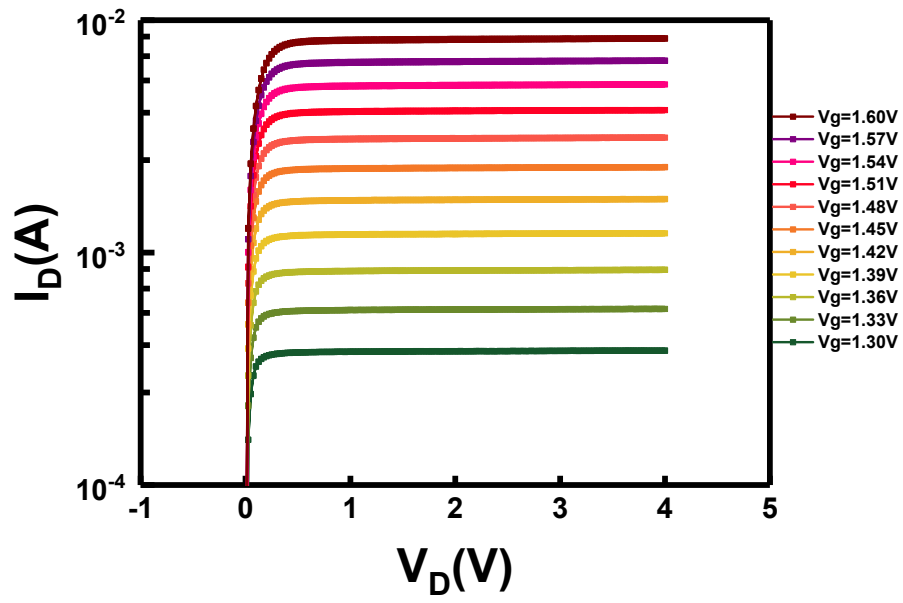

**Figure S9.**  $I_D$ - $V_D$  characteristics of the 2N7000 transistor measured under gradually increased gate voltages ( $V_g = 1.30$  to  $1.60$  V), corresponding to programmed level 1 to 11, showing distinct and well-separated current levels.

### Incremental Vg

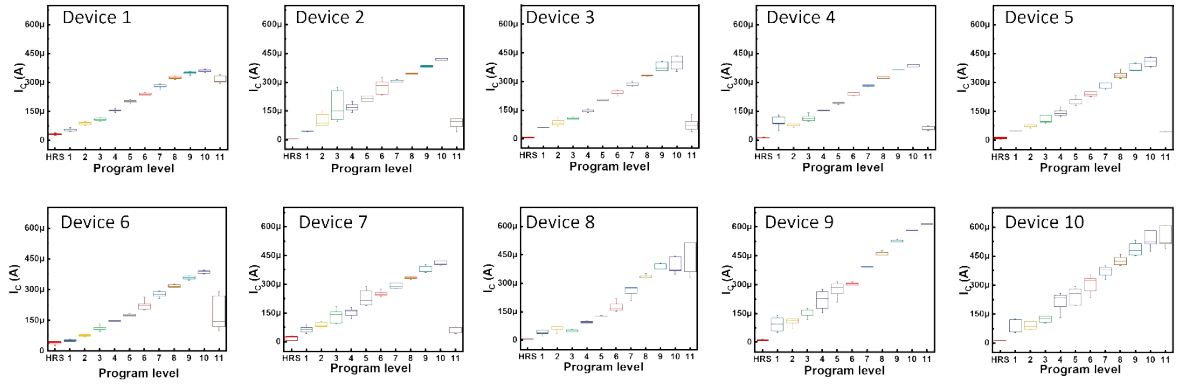

### Decremental Vg

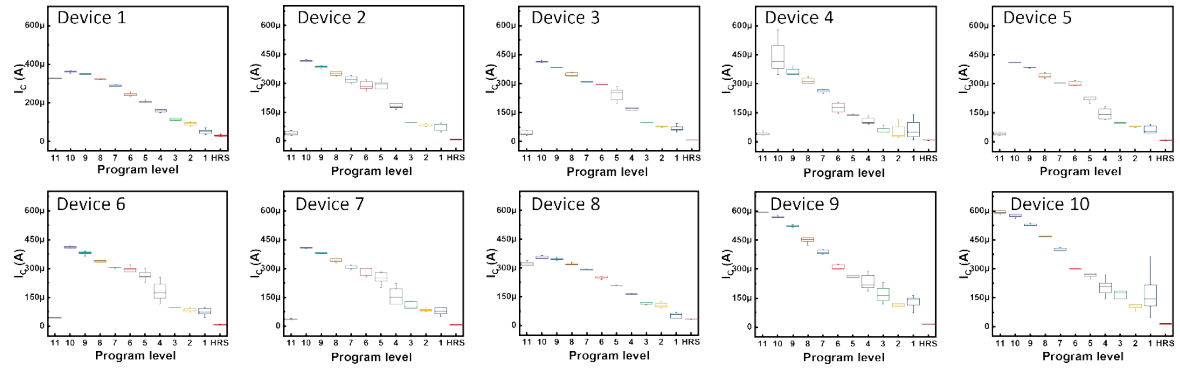

**Figure S10.** Statistical analysis of device-to-device (D2D) uniformity for 11 programmable levels measured from ten devices fabricated under identical conditions.

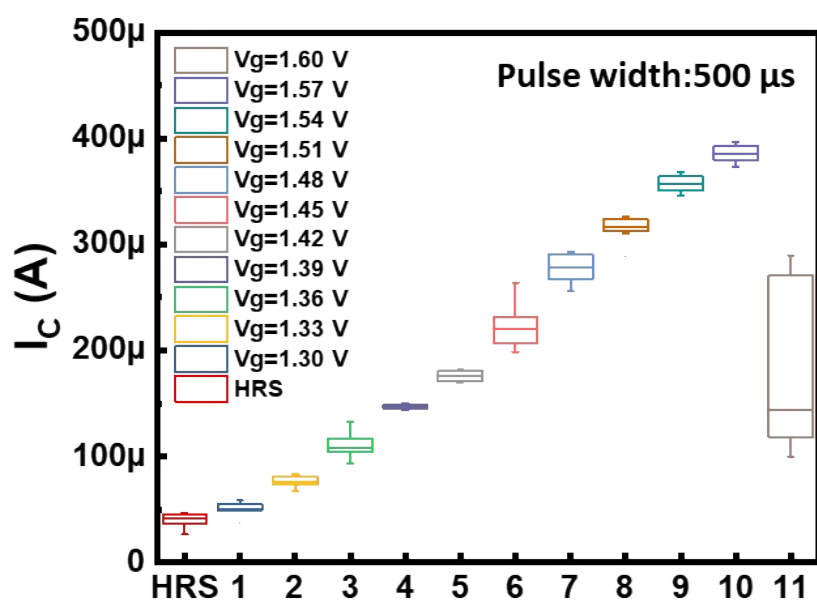

**Figure S11.** Box plot of read current distributions for 11 programmable levels obtained under a 500 μs pulse width. The results show ten well-defined low-resistance states and one high-resistance state (HRS).

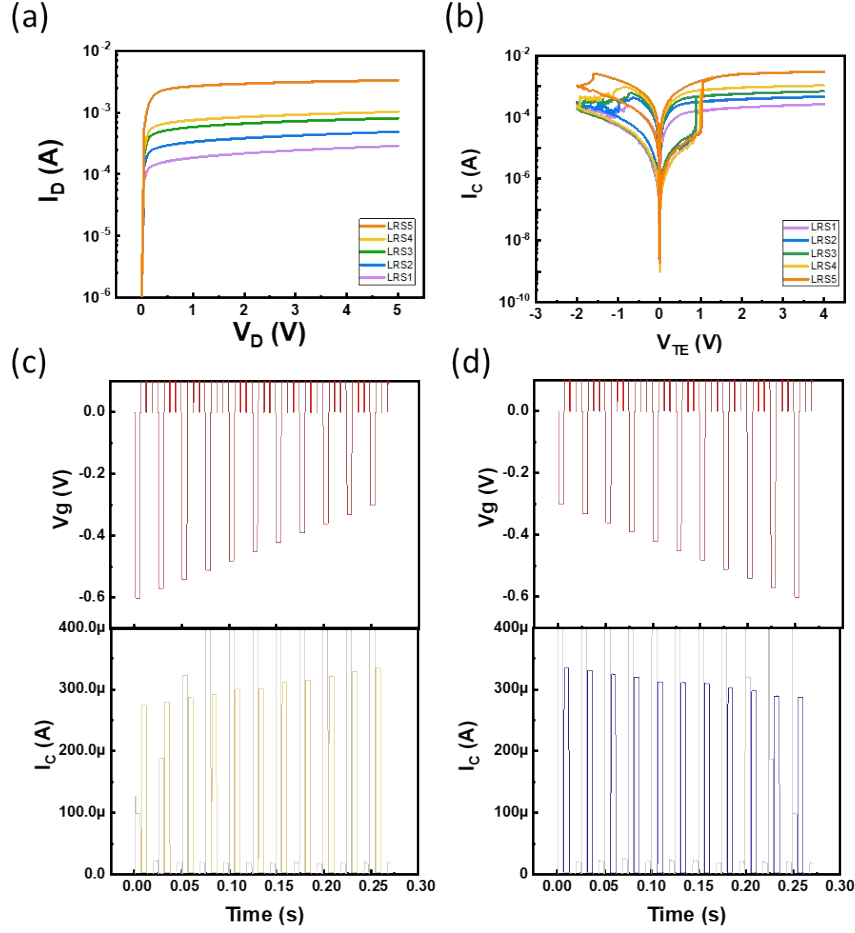

**Table S1 HRS Current read at -0.1 V corresponding to different LRS states**

| State              | HRS current@-0.1 V |
|--------------------|--------------------|
| LRS5 (3mA)         | 7.34E-06 A         |
| LRS4 (1mA)         | 2.53E-06 A         |
| LRS3 (700 $\mu$ A) | 5.28E-06 A         |
| LRS2 (500 $\mu$ A) | 6.00E-06 A         |
| LRS1 (300 $\mu$ A) | 3.46E-06 A         |

**Table S2** Comparison of Transistor–Memristor Architectures for Multistate and  $V_g$  Programming

| Device structure<br>(T+R)               | Number<br>of States | Retention             | Endurance          | $V_g$ pulse<br>programing | Bidirectional<br>Multistate | Ref.         |
|-----------------------------------------|---------------------|-----------------------|--------------------|---------------------------|-----------------------------|--------------|
| 2N(7000)+<br>Pt/Ta/ZrO <sub>x</sub> /Pt | 8                   | > 10000 s<br>(25 °C)  | >3000              | ✓                         | ✓                           | This<br>work |
| NMOS+<br>Ta/TaO <sub>x</sub> /Pt        | 6                   | -                     | >10 <sup>6</sup>   | ✓                         | ×                           | 【1】          |
| ITO/SiN/TaN<br>(Only R)                 | 8                   | > 10000 s<br>(25 °C)  | >1000              | -                         | ✓                           | 【2】          |
| NMOS+<br>Ti/HfO <sub>2</sub> /TiN       | 6                   | > 10000 s<br>(125 °C) | >5x10 <sup>5</sup> | ×                         | ×                           | 【3】          |
| CMOS+<br>TiN/Ti/HfO <sub>2</sub> /TiN   | 9                   | -                     | 10                 | ×                         | ×                           | 【4】          |
| NMOS+<br>TiN/Ti/HfO <sub>2</sub> /TiN   | 9                   | -                     | -                  | ✓                         | ×                           | 【5】          |

## Reference:

1. E. J. Merced-Grafals, N. Dávila, N. Ge, R. S. Williams and J. P. Strachan, *Nanotechnol.*, 2016, **27**, 365202.
2. D. Ju, S. Kim and S. Kim, *Nanomater.*, 2023, **13**, 2477.
3. P.-H. Chen, Y.-T. Su, W.-C. Huang and C.-W. Wu, *IEEE Trans. Electron Devices*, 2023, **70**, 1014-1018.
4. E. P.-B. Quesada, T. Rizzi, A. Gupta, M. K. Mahadevaiah, A. Schubert, S. Pechmann, R. Jia, M. Uhlmann, A. Hagelauer and C. Wenger, 2023 14th Conference on Electron Devices (CDE), Spanish, 2023.
5. V. Milo, A. Glukhov, E. Pérez, C. Zambelli, N. Lepri, M. K. Mahadevaiah, E. P.-B. Quesada, P. Olivo, C. Wenger and D. Ielmini, *IEEE Trans. Electron Devices*, 2021, **68**, 3832-3837.
